# Supplementary figures and images for: A versatile UCST-type composite microsphere for image-guided chemoembolization and photothermal therapy against liver cancer
Source: Royal Society of Chemistry journal article supplement (doi:10.1039/d0nr04592f), 2020-01-01

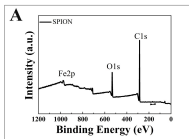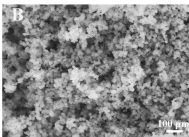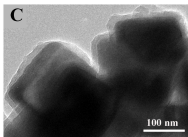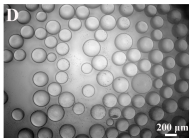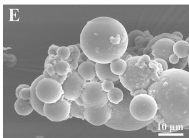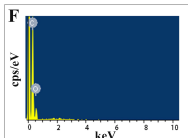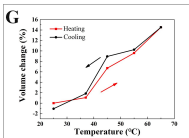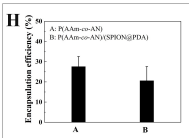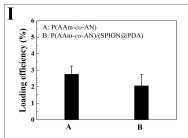

Supplement: d0nr04592f2.pdf [file d0nr04592f2.pdf]

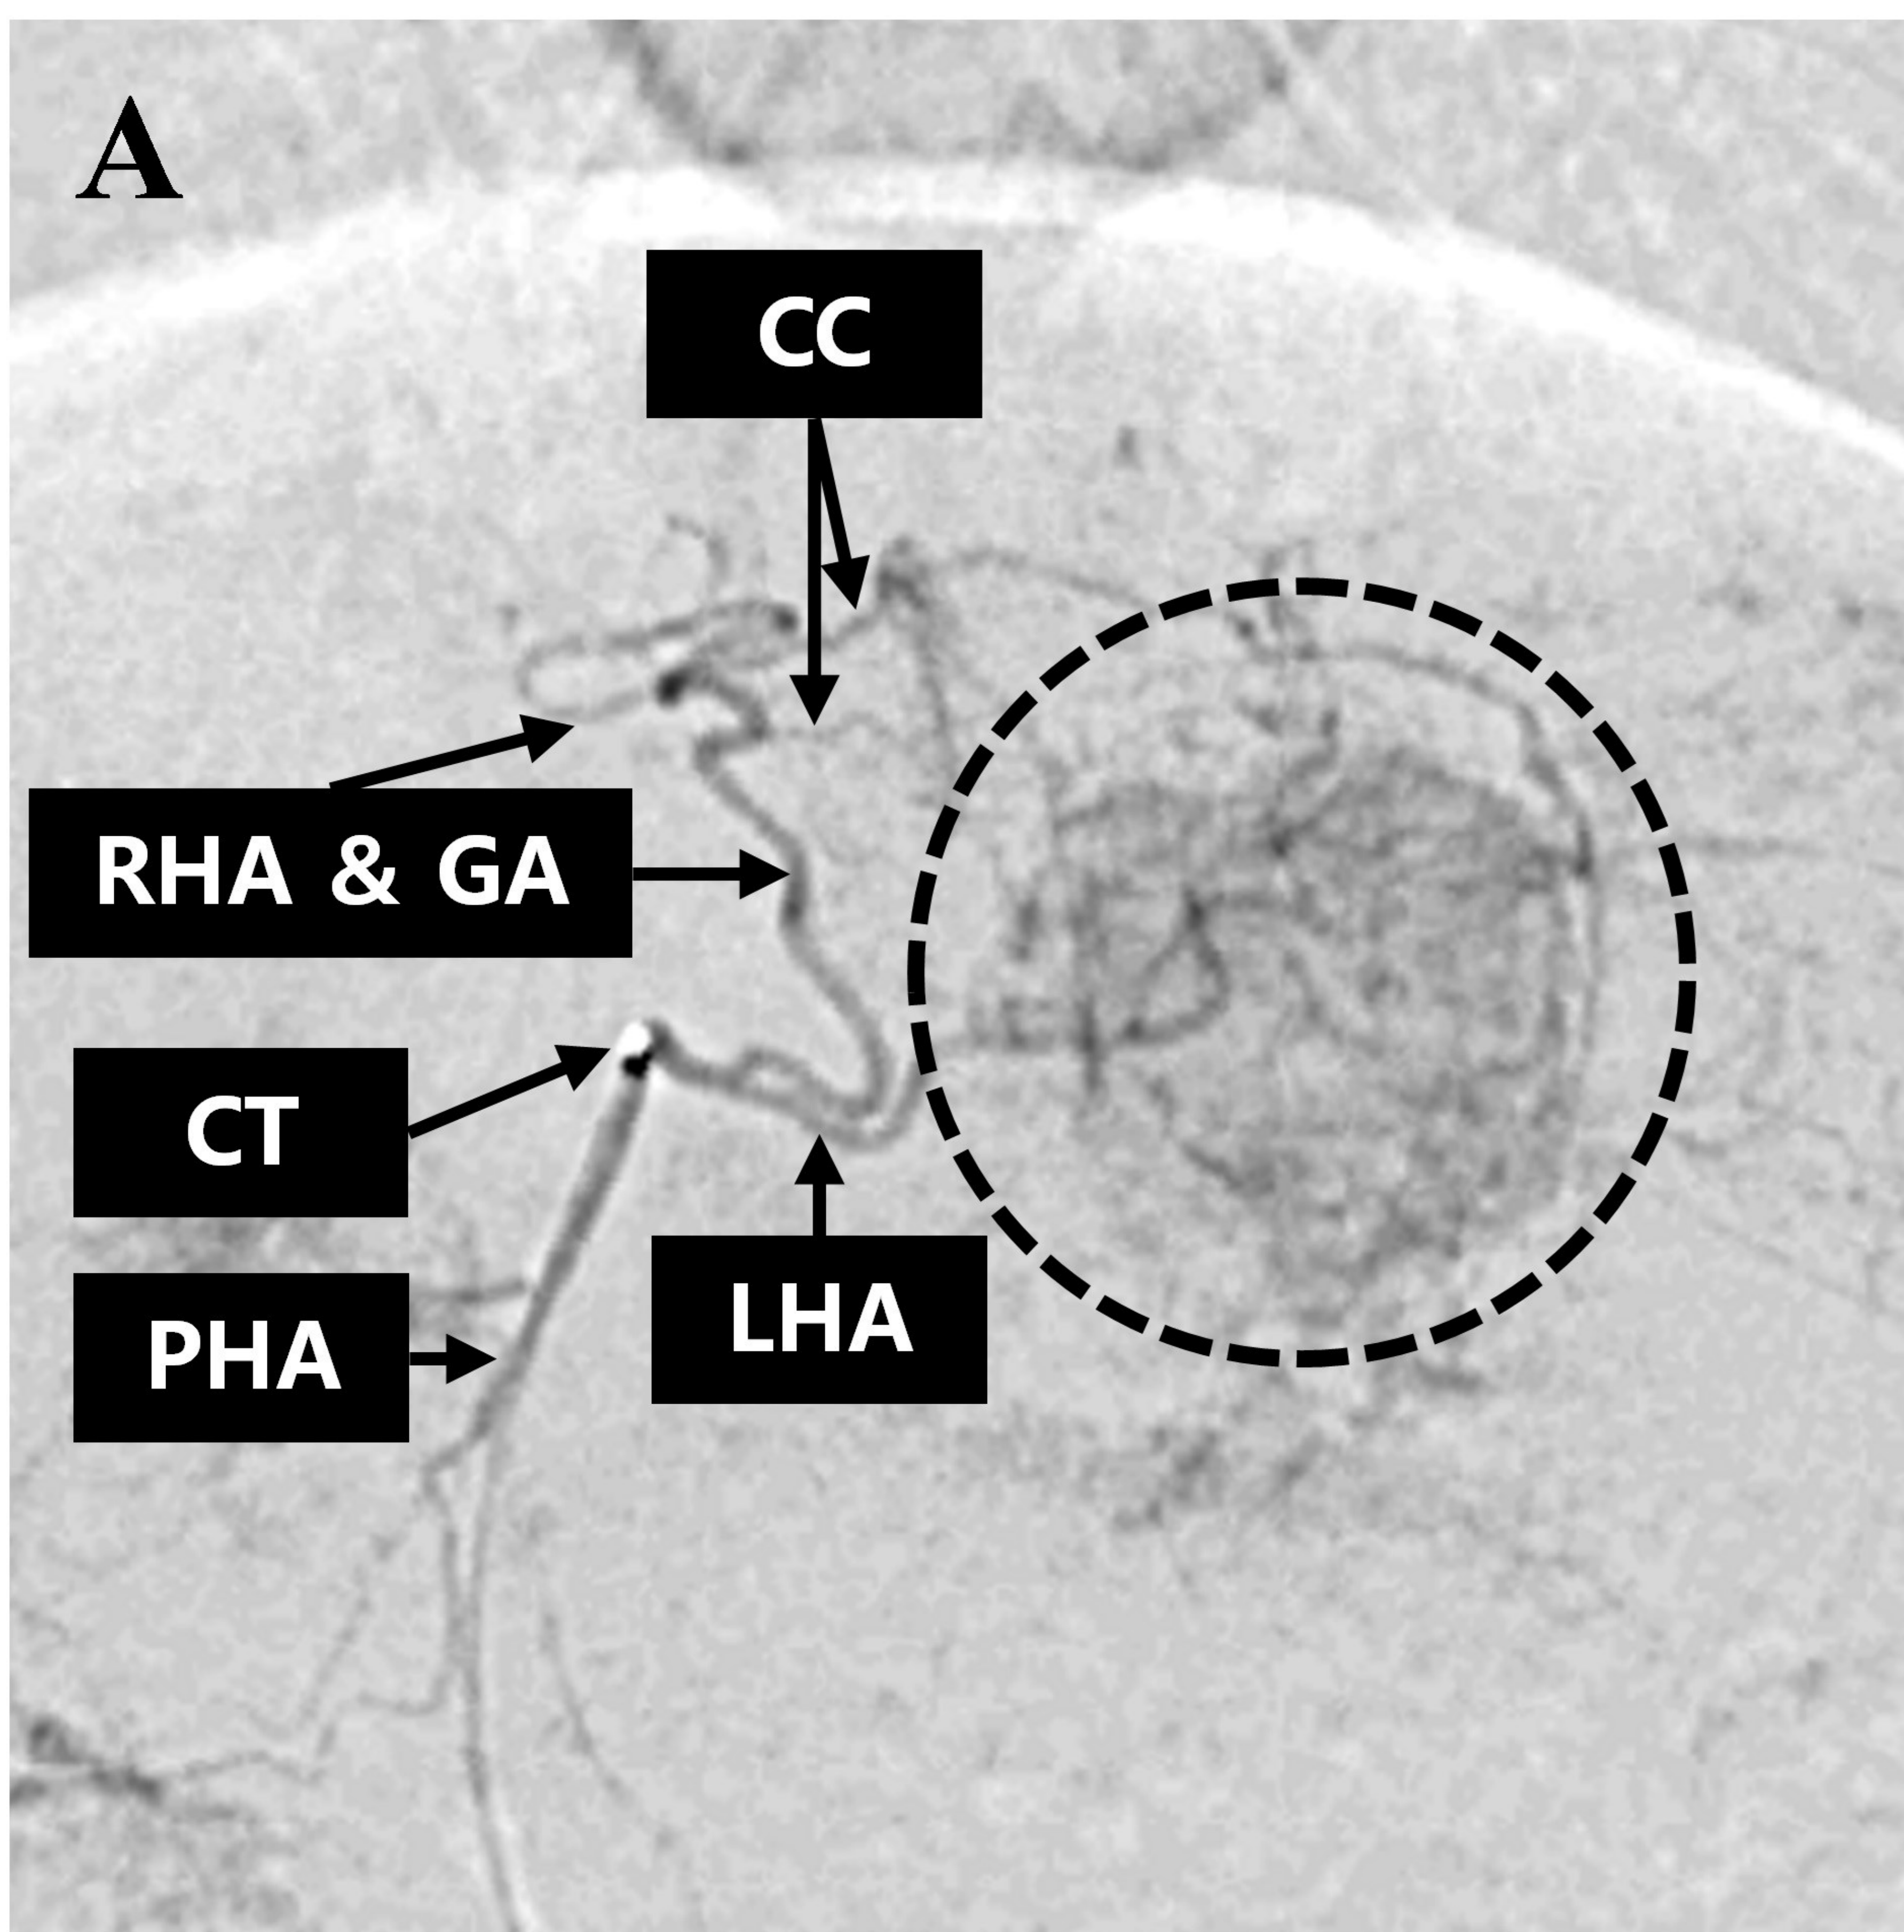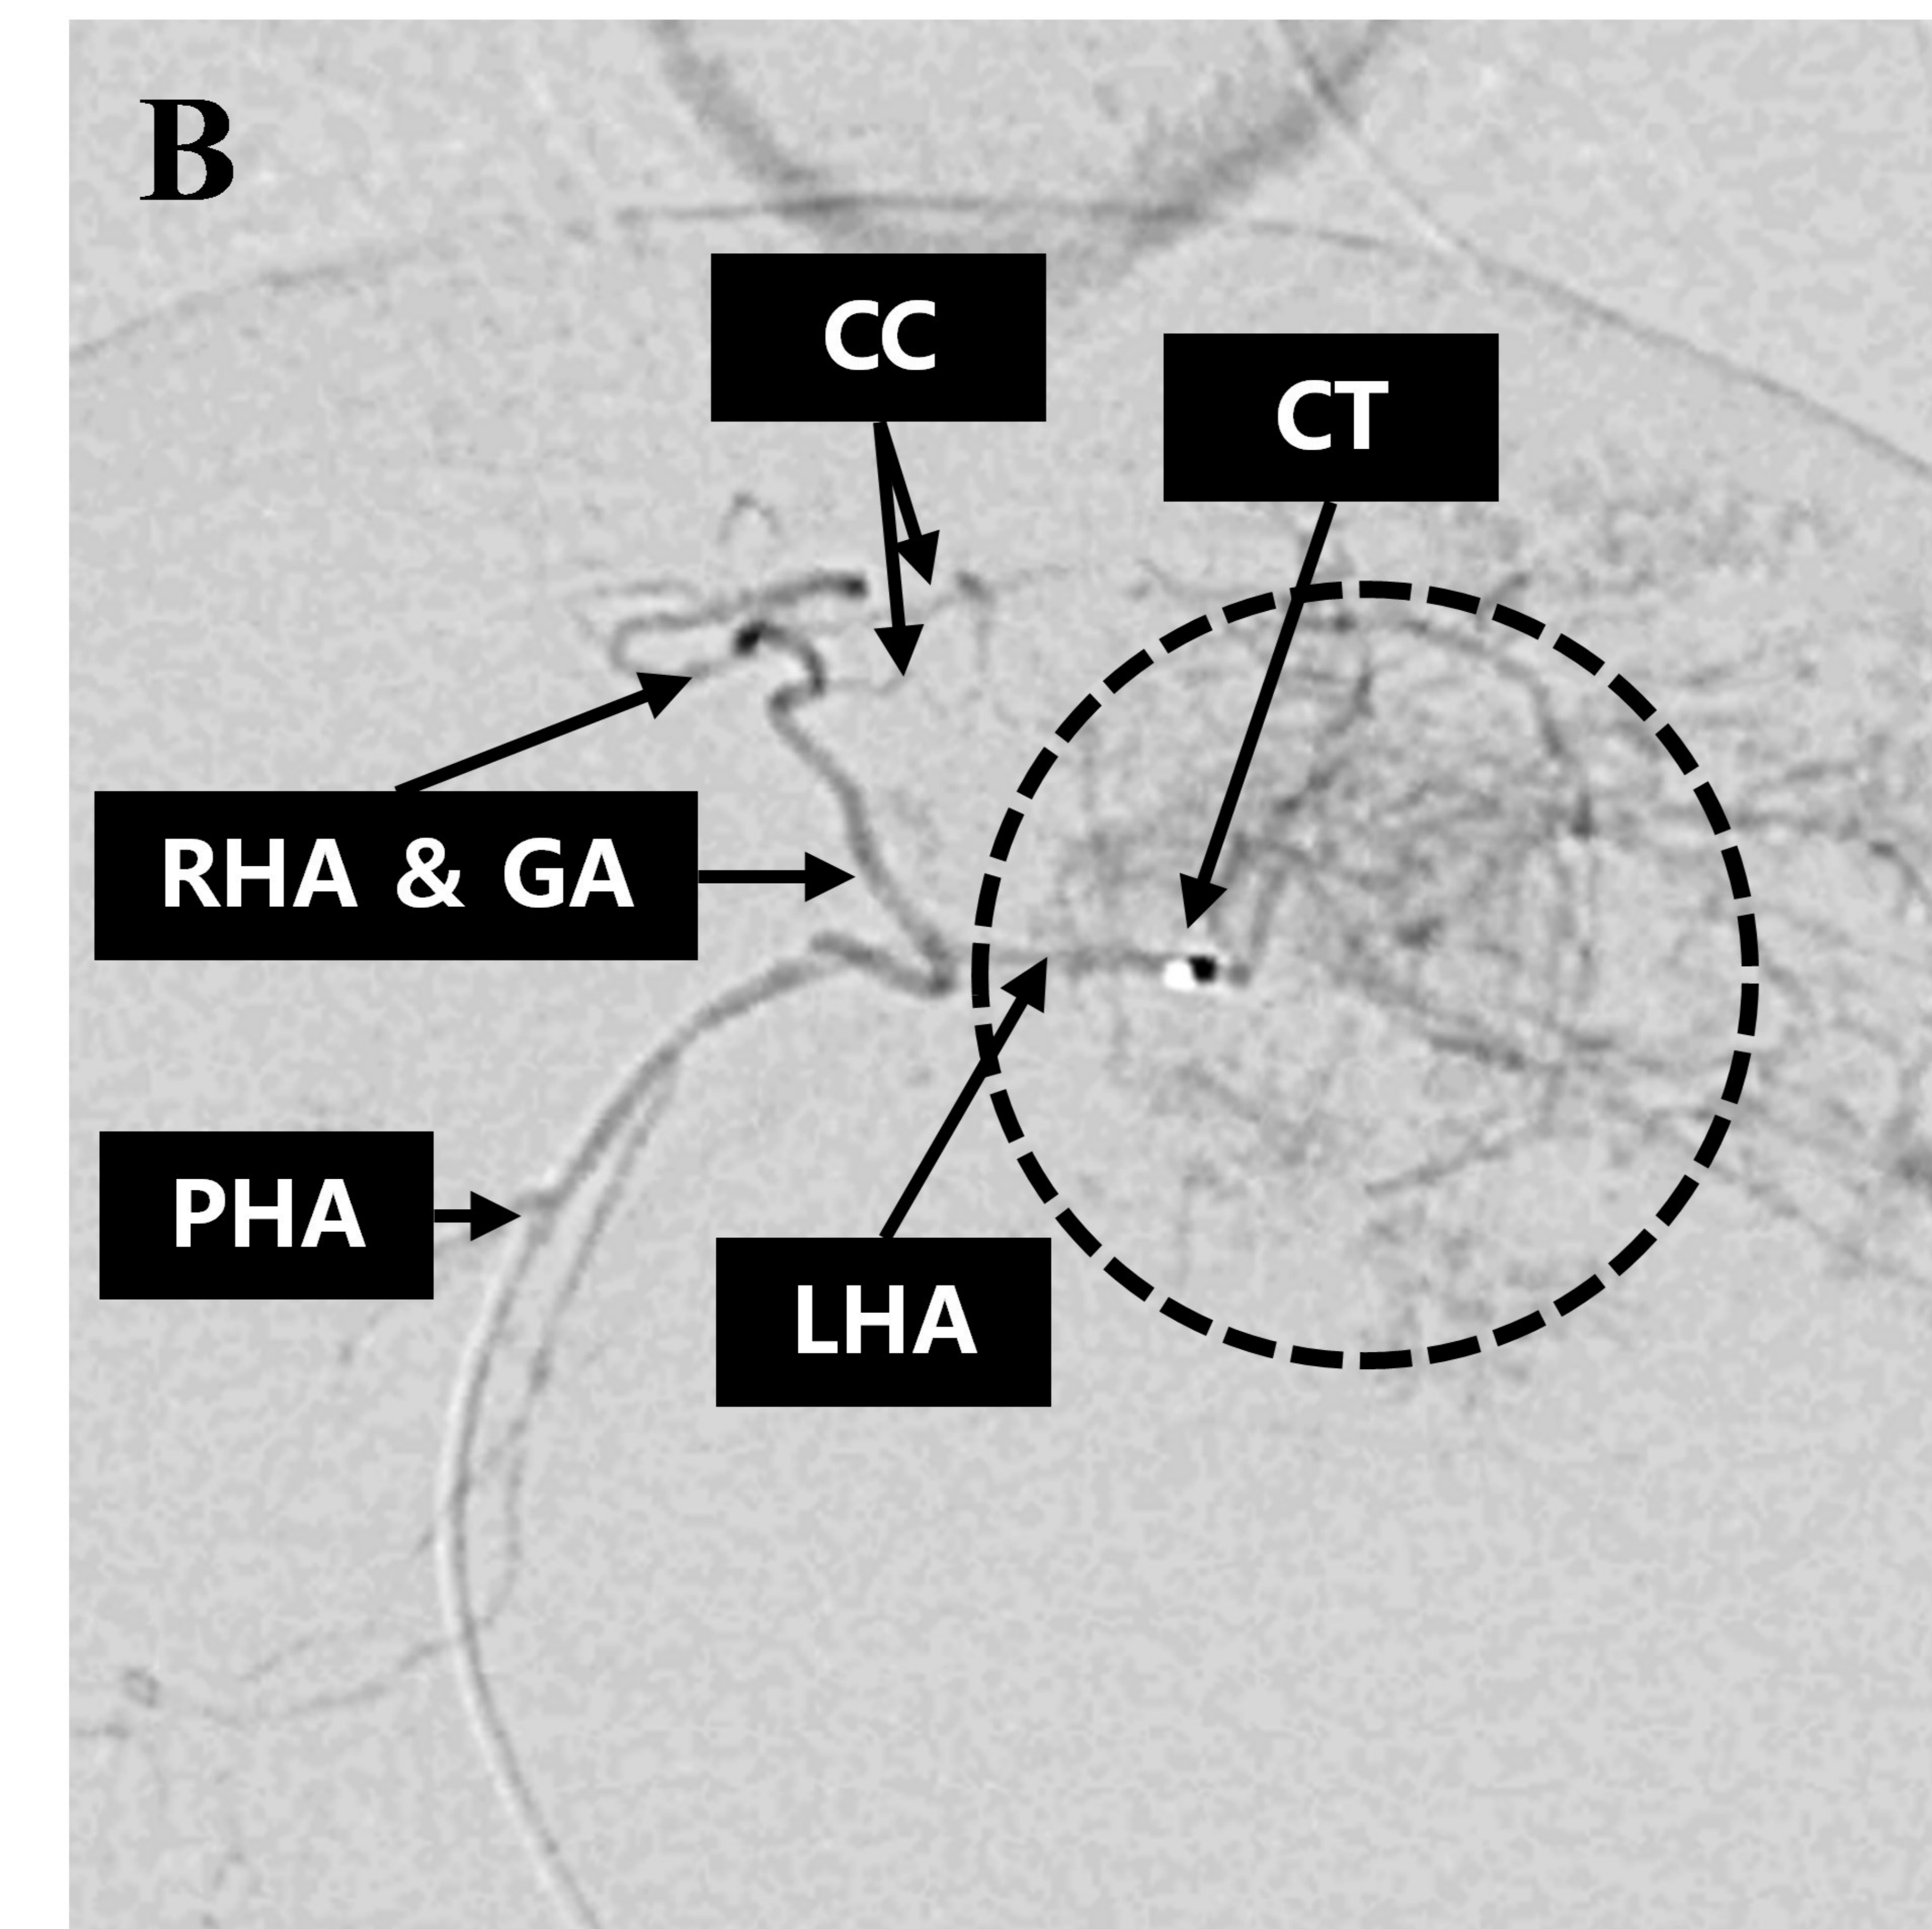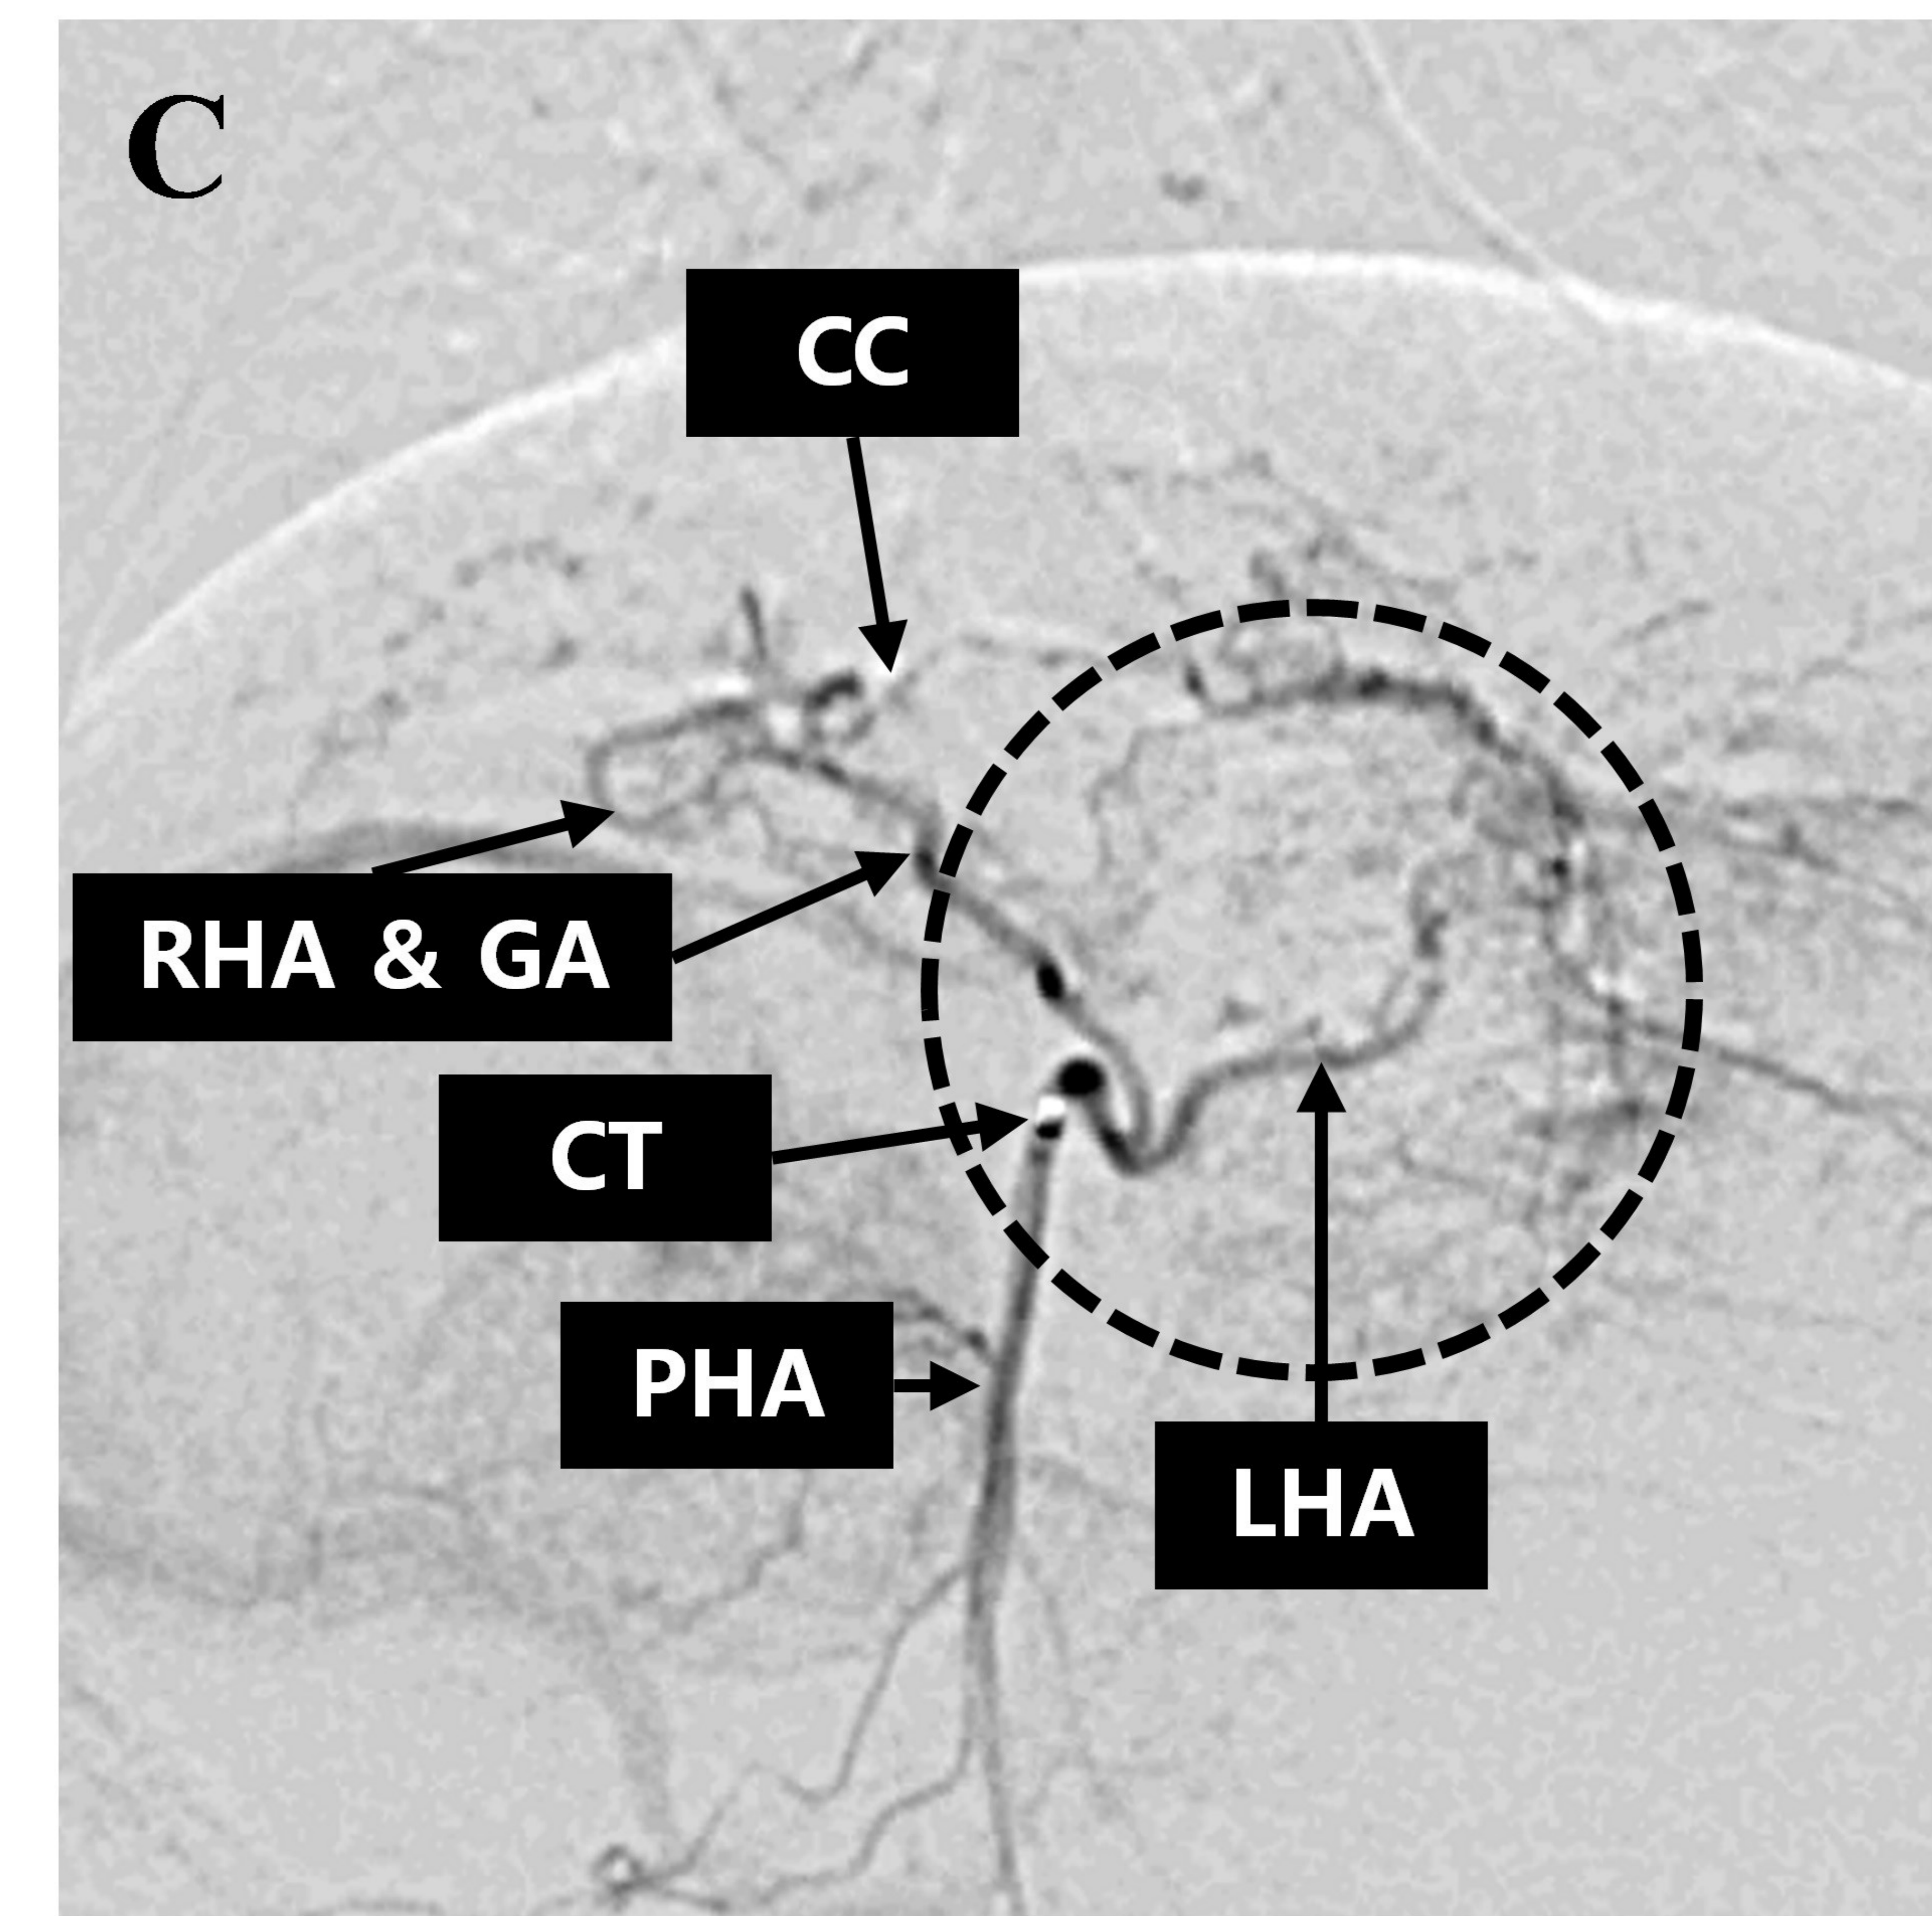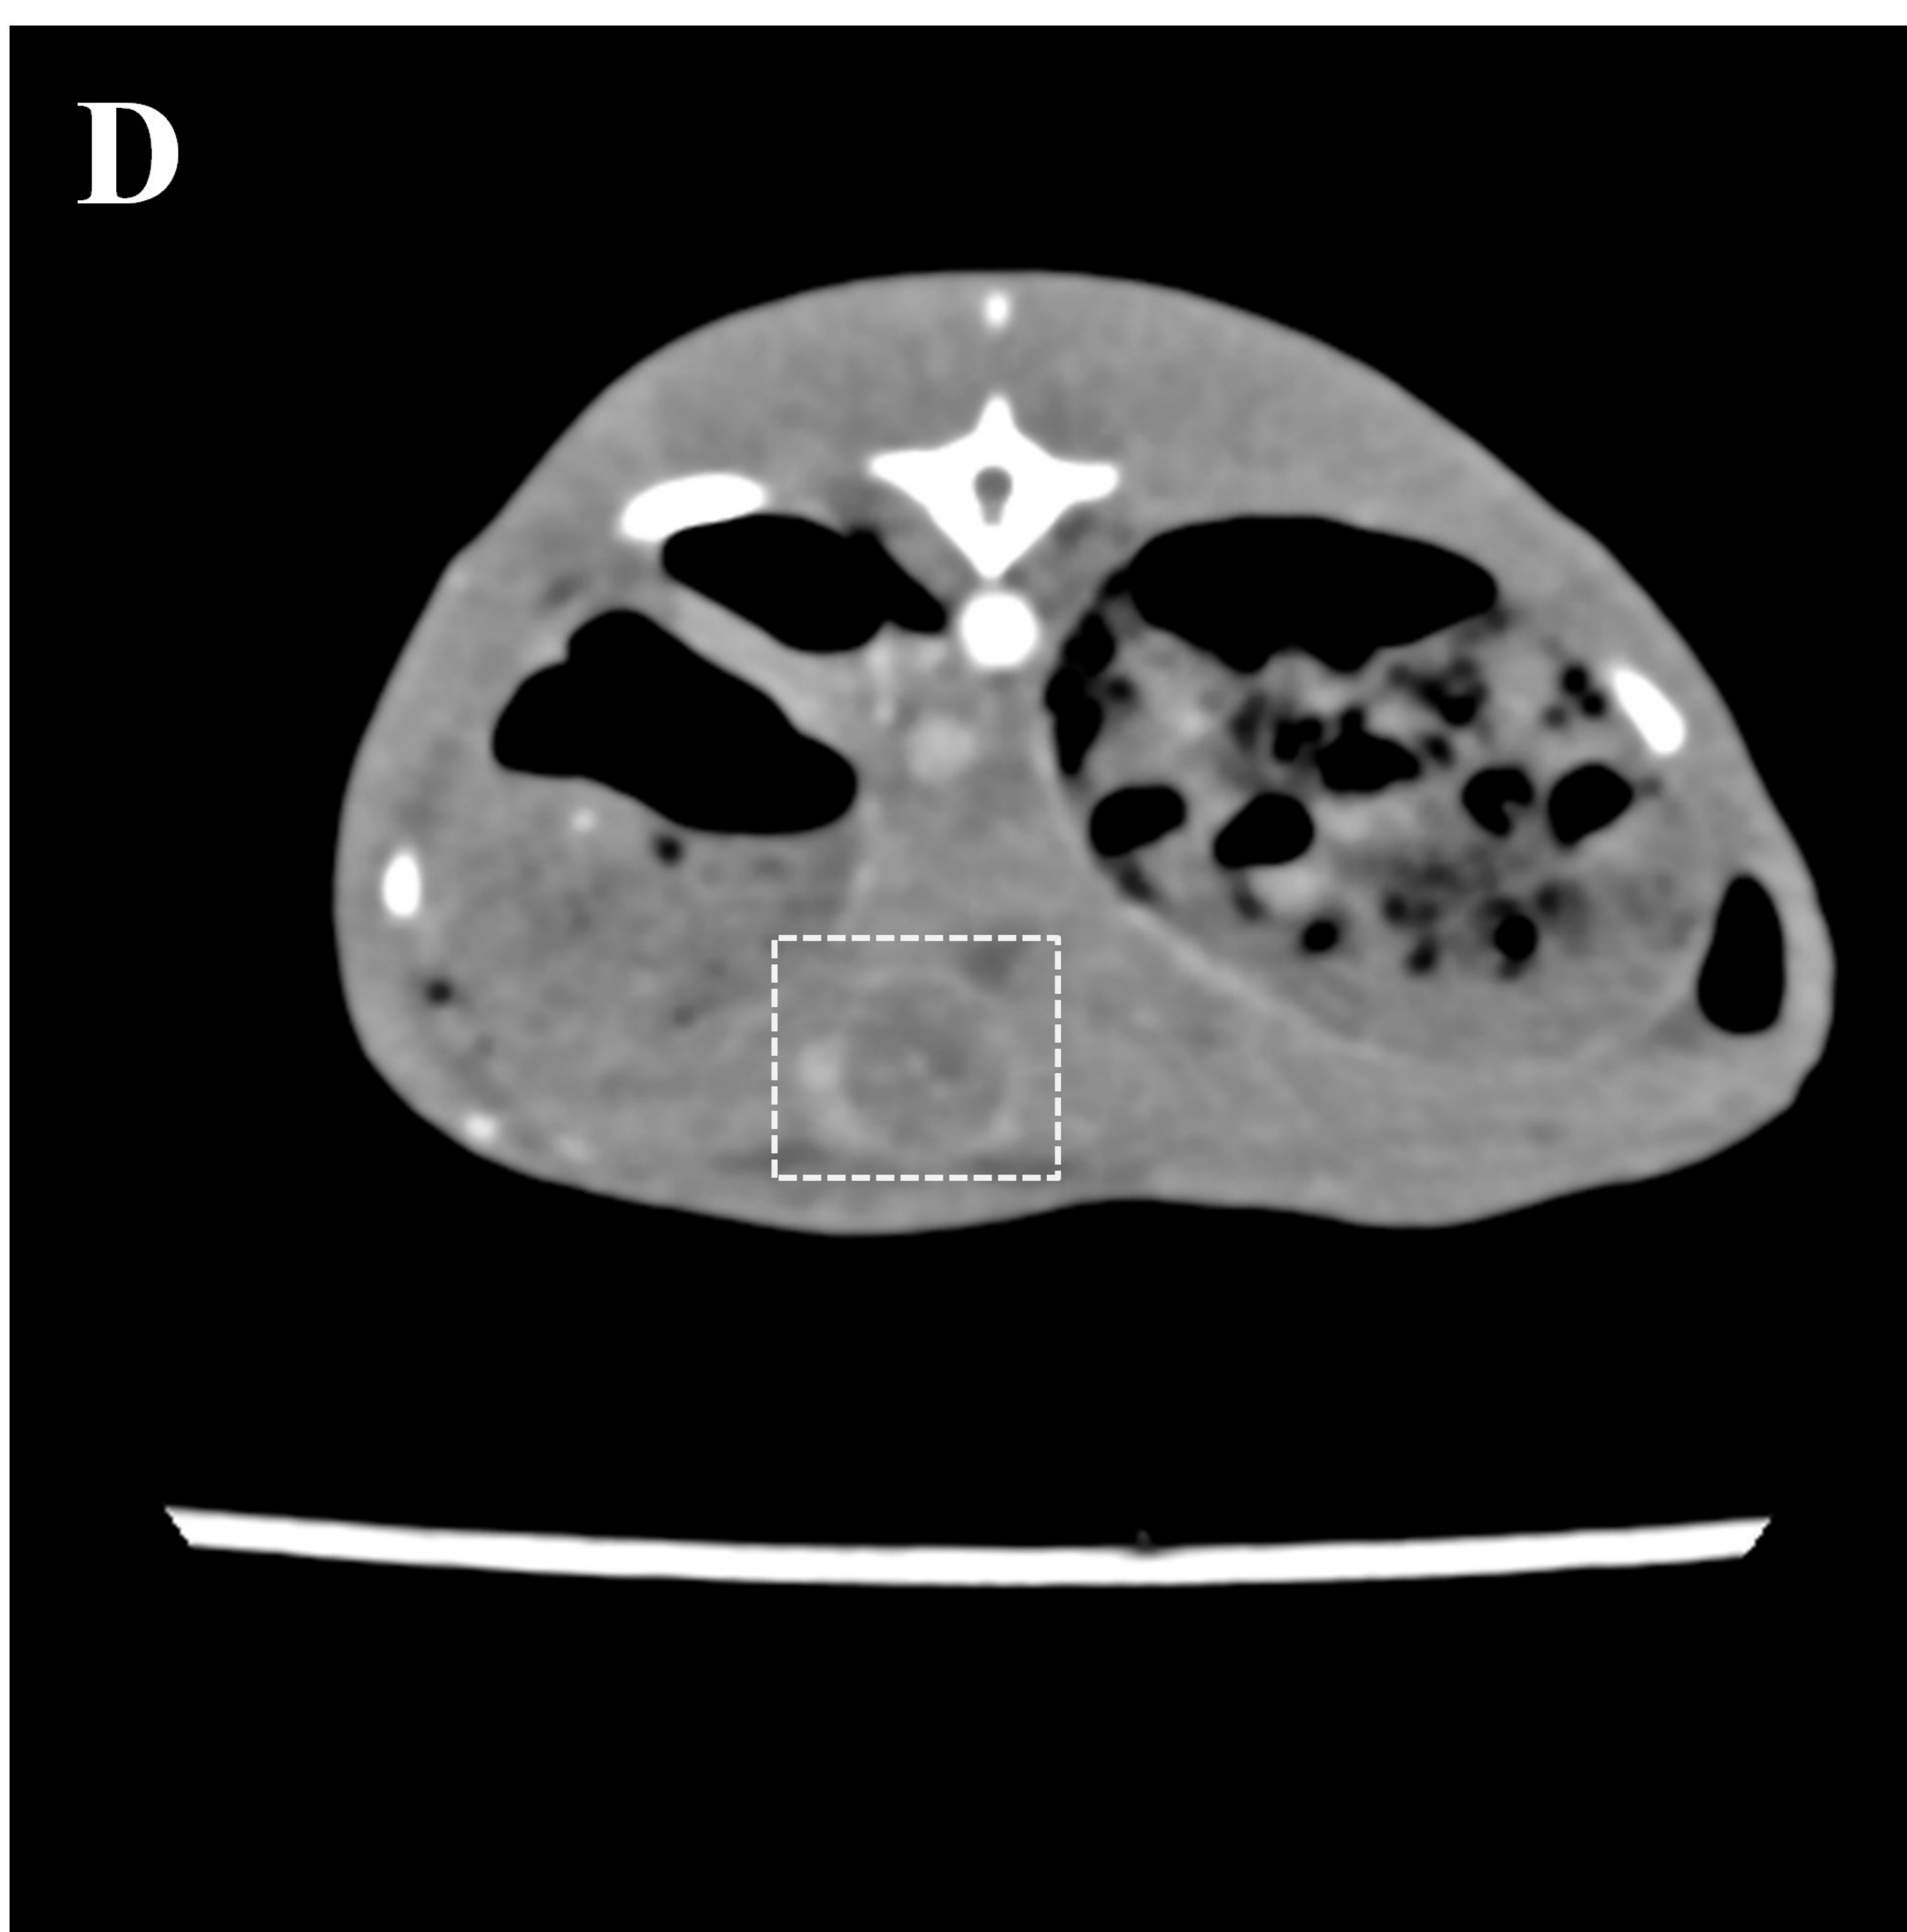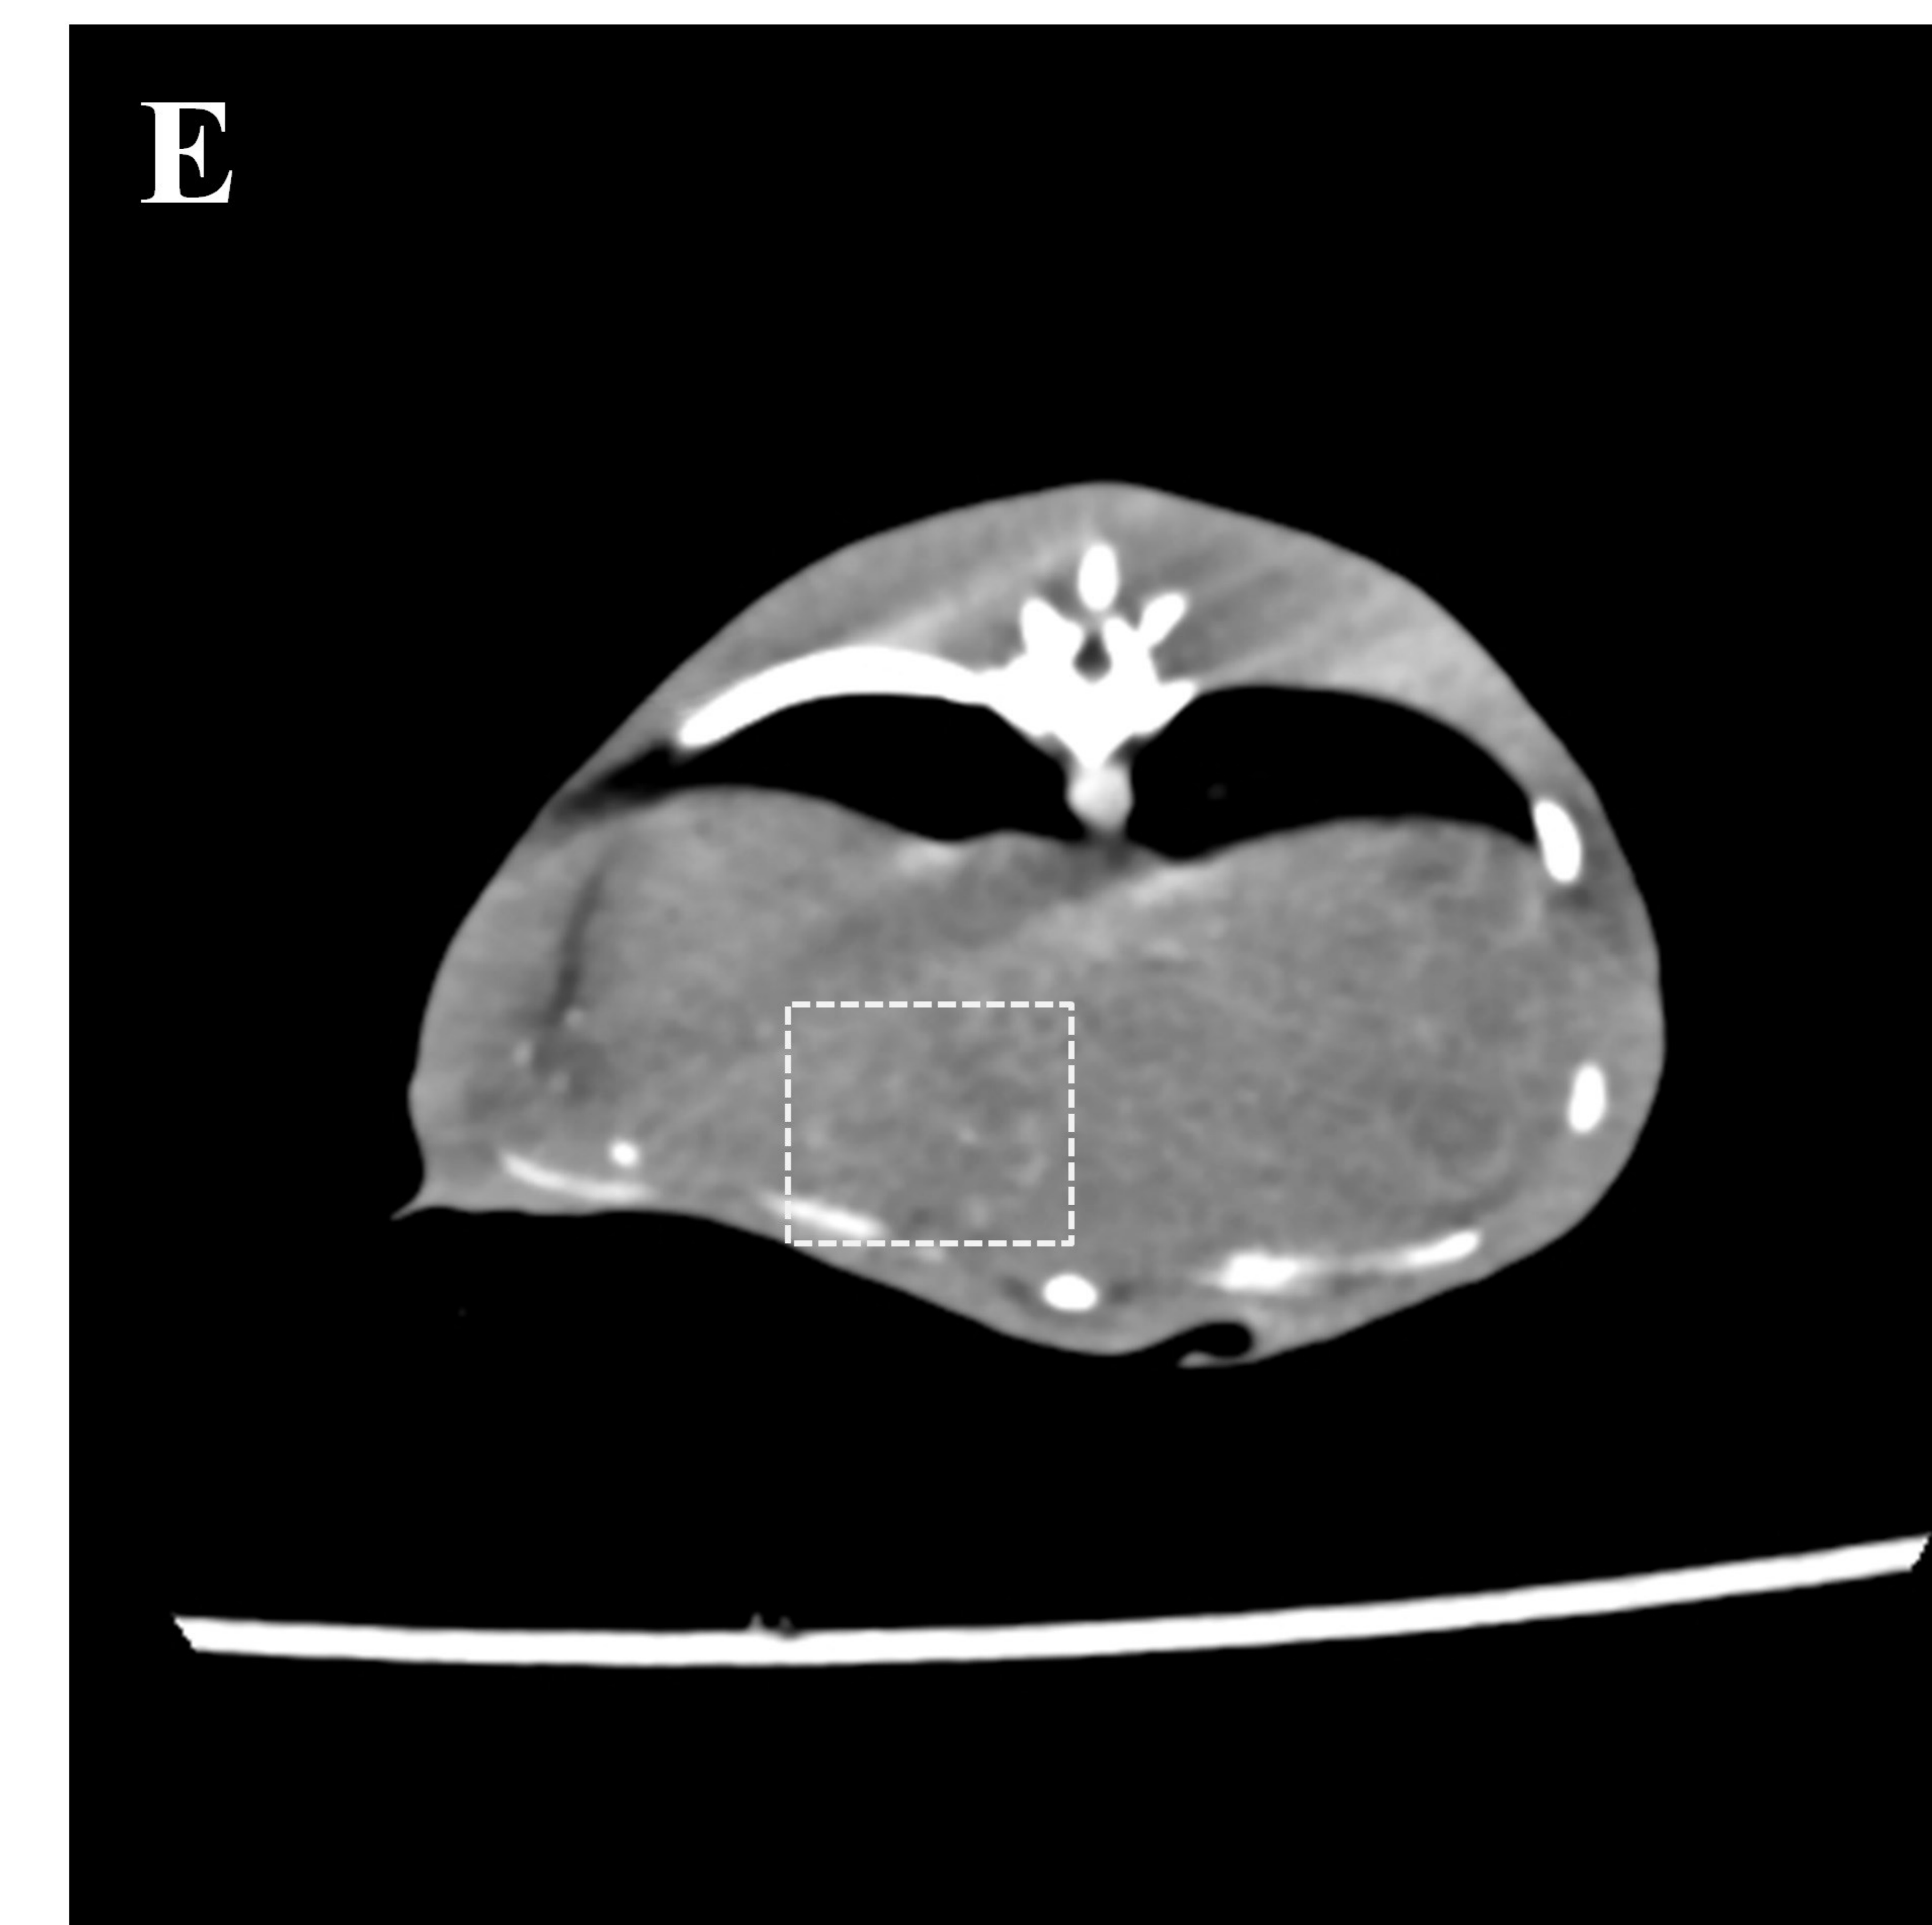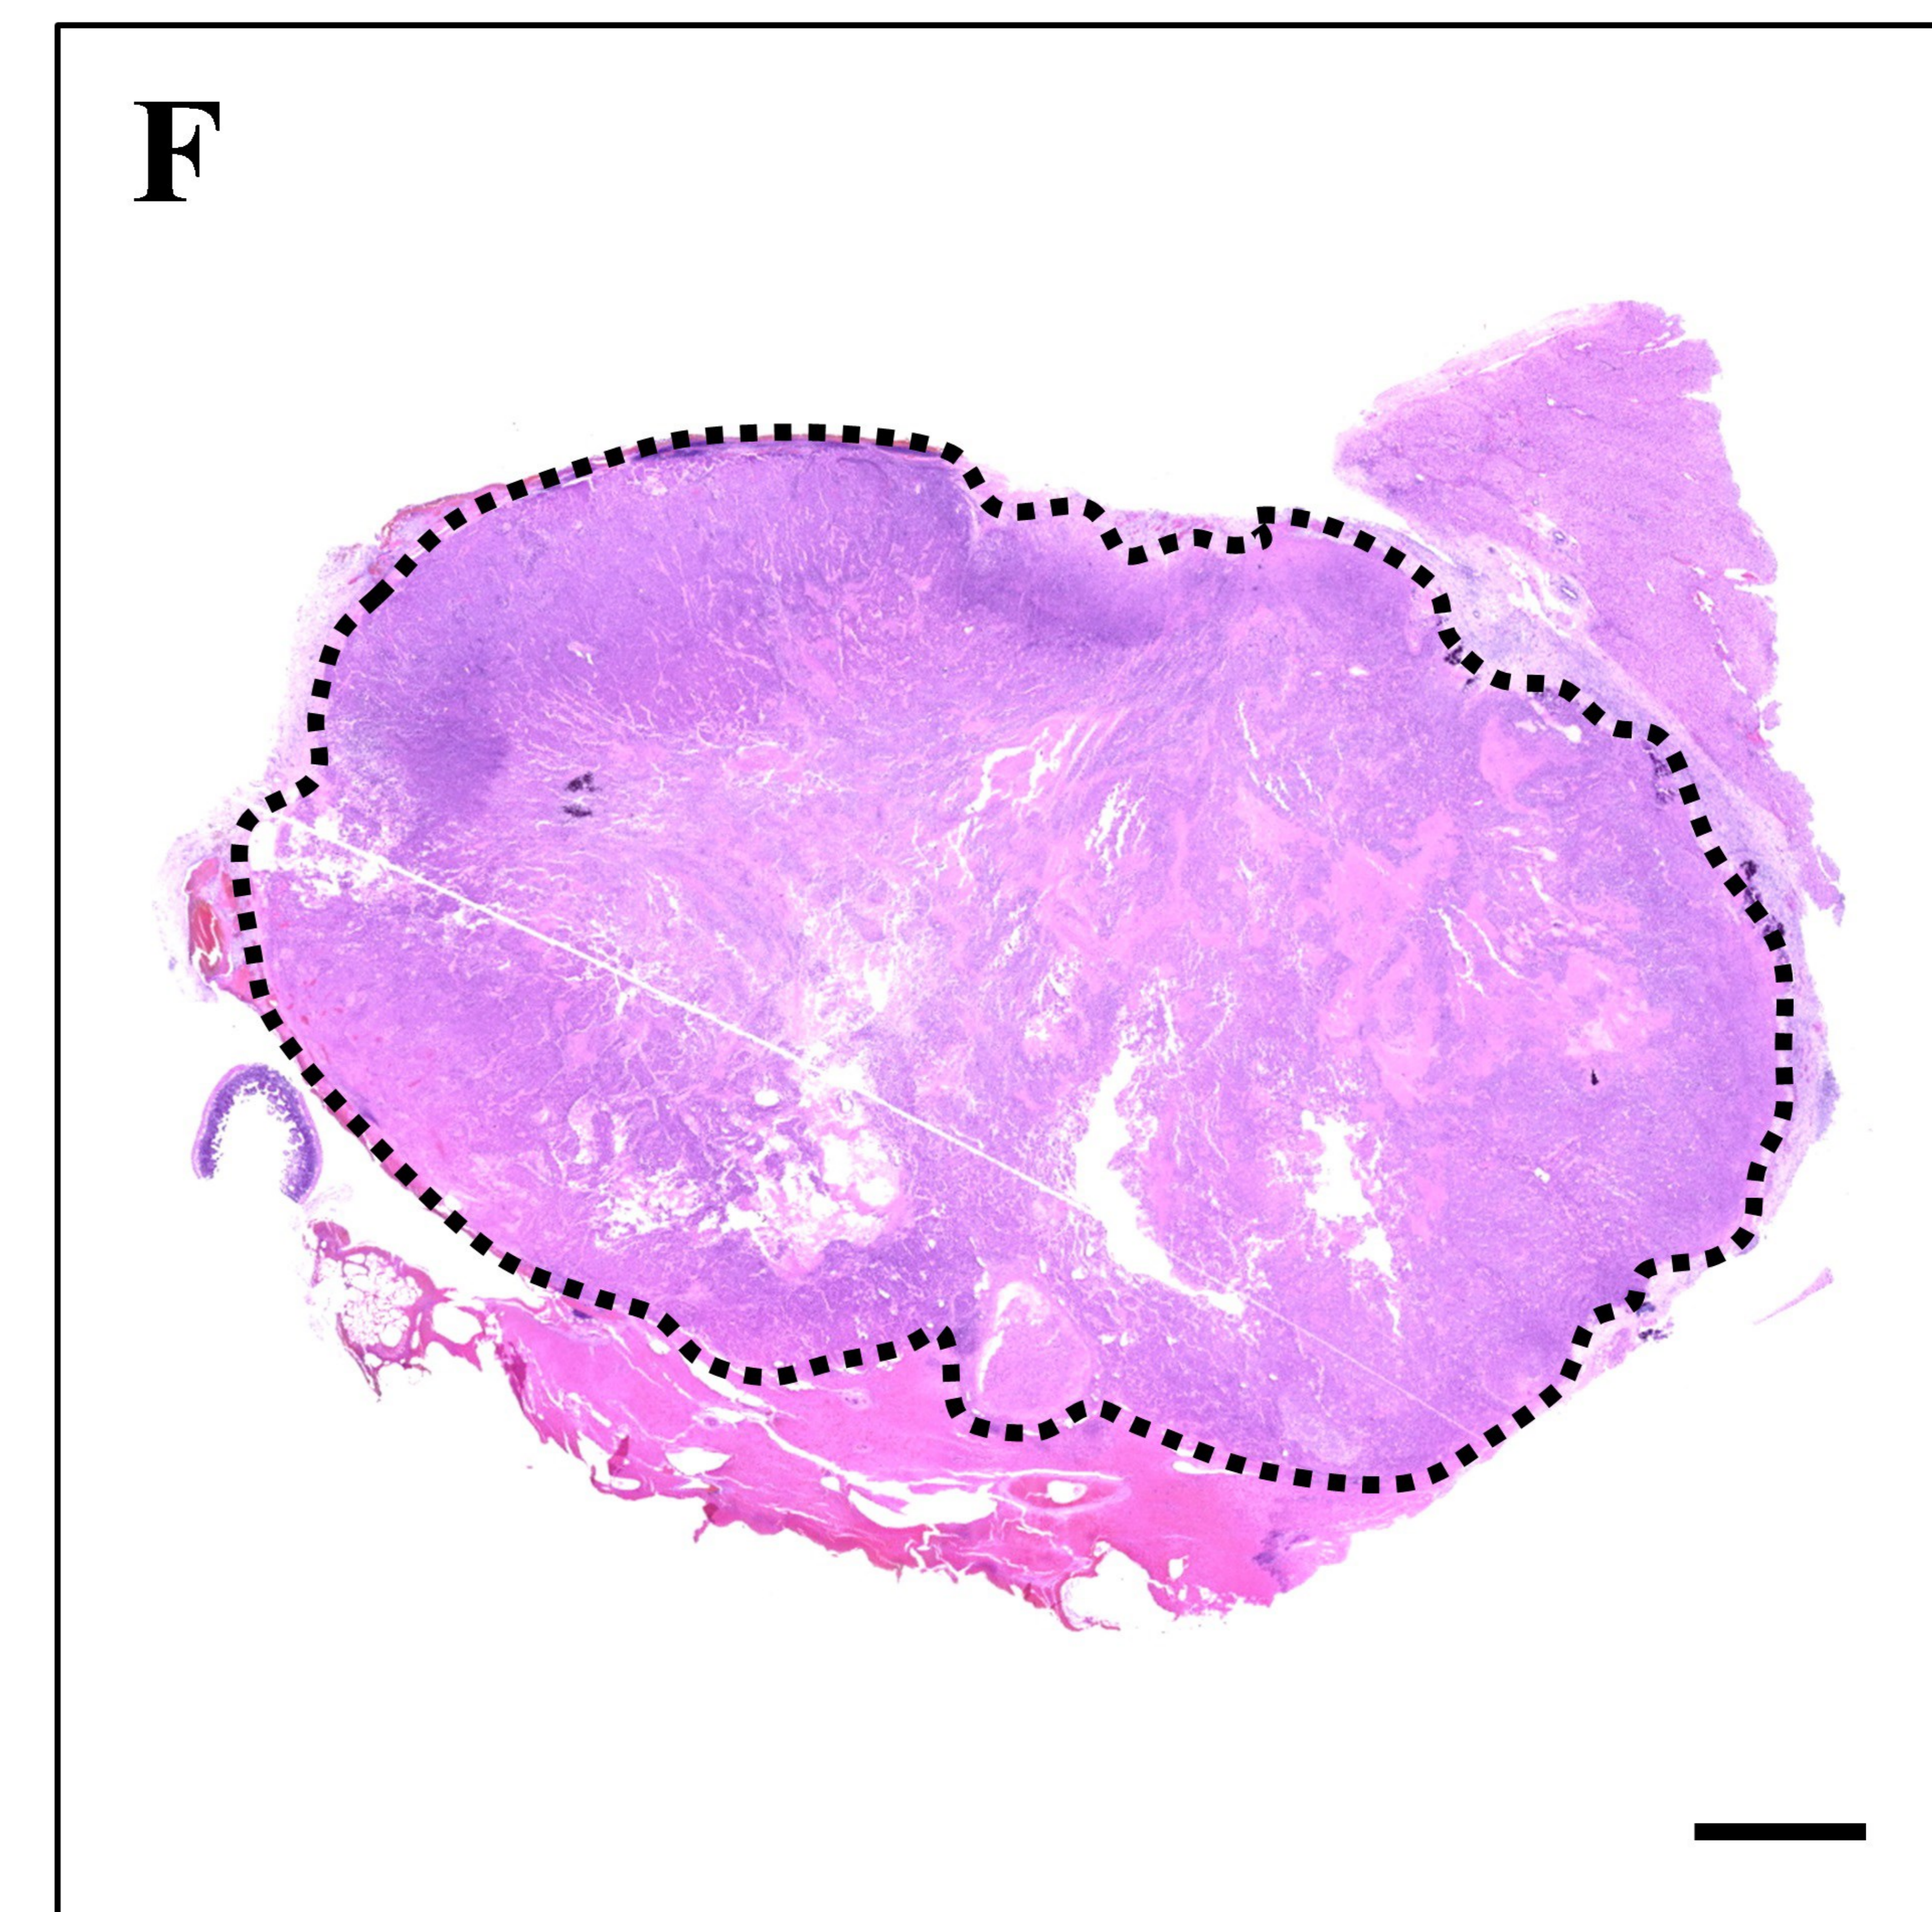

Supplement: d0nr04592f3.pdf [file d0nr04592f3.pdf]
